# Supplementary material
Source: HighWire-hosted journal article supplement (https://rapm.bmj.com/highwire/filestream/18039/field_highwire_adjunct_files/0/rapm-2021-103136supp001_data_supplement.pdf)
Supplement: rapm-2021-103136supp001_data_supplement.pdf [file rapm-2021-103136supp001_data_supplement.pdf]

**APPENDIX 1.0 - LONG LIST OF SUGGESTED ITEMS FOR DOCUMENTATION IN REGIONAL ANESTHESIA****Patient information:**

1. Name<sup>1-6</sup>
2. Age<sup>3-6</sup>
3. Date of birth
4. Gender<sup>3</sup>
5. Medical record/ hospital number<sup>1-6</sup>
6. Weight<sup>1,3</sup>
7. Height<sup>3</sup>
8. BMI
9. ASA<sup>1,3</sup>
10. Allergy<sup>1,3</sup>

**Procedure Preparation:**

11. Block performed by \_\_\_\_\_ (name)<sup>1,3,5-8</sup>
12. Consent<sup>5,7,9</sup>
13. Individual risks of procedure discussed and documented<sup>1,9,10</sup>
14. Pre-anesthetic evaluation<sup>7</sup>
15. Pre-op diagnosis (Post-operative pain management / surgical diagnosis)<sup>5,6</sup>
16. Timeout / WHO checklist<sup>5,6</sup>
17. Stop moment performed
18. Coagulation considered<sup>5</sup>
19. IV access<sup>5</sup>
20. Block procedure name<sup>1,3,5,6</sup>
21. Indication for regional anesthesia (purpose of the block)<sup>6,8</sup>
22. Request by surgeon for placement for pain management<sup>6,8</sup>
23. Patient position during the regional anesthesia procedure<sup>3,6,7</sup>
24. Monitors applied<sup>2,5,6,11</sup>
25. Baseline vital signs<sup>12</sup>
26. Baseline visual analogue score (VAS)<sup>13</sup>
27. Pre-medication (type and quantity of sedation)<sup>1,5,6,14,15</sup>
28. Level of sedation (no sedation / light sedation / deep sedation / GA)<sup>6</sup>
29. Indication for block under spinal, epidural or general anesthesia<sup>5</sup>

**Procedure Performance:**

1. Time and date of regional anesthetic procedure<sup>6,8,14</sup>
2. Aseptic agent used<sup>5,6,16</sup>
3. Sterile gloves used
4. Mask used
5. Gown used
6. Ultrasound probe decontaminated in accordance with local policy
7. Sterile ultrasound transducer cover used
8. Sterile drape used<sup>6</sup>
9. Skin infiltration with local anesthetic<sup>6</sup>
10. Needle design: tip, manufacturer, length, gauge<sup>5,6,17</sup>

11. Local anesthetic used for regional anesthetic technique (concentration and volume)<sup>5-7</sup>
12. Adrenaline dose used (concentration)<sup>6</sup>
13. Adjunct used<sup>5,6,18</sup>

**Specific for Regional Nerve Block Procedures:**

30. Side of block<sup>19</sup>
31. Block side marked
32. Technique of needle localization (ultrasound / nerve stimulator / landmark technique)<sup>5-7,20</sup>
33. Approach used (In plane / out of plane)<sup>1,3,5,6,9,20</sup>
34. No EMR < \_\_\_mA when applicable<sup>5,6</sup>
35. Minimum current and current duration<sup>6,21</sup>
36. Description of motor response<sup>20</sup>
37. Description of quality of paresthesia<sup>22</sup>
38. Catheter tip location confirmed by ultrasound / nerve stimulator<sup>6</sup>
39. Technique of injection (via needle or catheter)<sup>6,23</sup>
40. Note on incremental injection<sup>11</sup>
41. Extra-neural spread visualized<sup>5,6</sup>
42. Note on resistance during injection (pressure < 15psi)<sup>5,6,24</sup>
43. Absence of blood on aspiration<sup>5,6</sup>
44. Needle depth before injection<sup>6,21</sup>
45. Catheter depth at the skin<sup>6,23</sup>
46. Absence of pain / paresthesia during injection<sup>5,6,14,21</sup>

**Specific for Neuraxial Procedures:**

47. Approach used (e.g. median / paramedian)<sup>1,3,5,6,9,20</sup>
48. Vertebral level of needle insertion<sup>14</sup>
49. Technique used: Loss of resistance to saline / air for epidural insertion
50. Number of attempts<sup>5</sup>
51. Epidural needle depth at loss of resistance<sup>6,21</sup>
52. Catheter depth at the skin<sup>6,23</sup>
53. Note on aspiration and action taken<sup>11</sup>
54. Absence of pain / paraesthesia during injection<sup>5,6,14,21</sup>
55. Epidural test dose
56. Dermatomal level of spinal or epidural block achieved<sup>7,14</sup>
57. Complications<sup>7</sup>

**Post Procedure:**

58. Adequacy of regional anesthesia procedure<sup>5,15</sup>
59. Complications<sup>7</sup>
60. Patient vital signs after the procedure<sup>25</sup>
61. Patient visual analogue score after the procedure<sup>15</sup>
62. Post procedure instructions<sup>5</sup>

**REFERENCES:**

1. Elhalawani I, Jenkins S, Newman N. Perioperative anesthetic documentation: Adherence to current Australian guidelines. *J Anaesthesiol Clin Pharmacol*. 2013;29(2):211-215.
2. Kendall F. Documenting local anesthesia patient care. Developing the tool. *AORN J*. 1993;58(4):715-719.
3. Jang J, Yu SH, Kim CB, Moon Y, Kim S. The effects of an electronic medical record on the completeness of documentation in the anesthesia record. *Int J Med Inform*. 2013;82(8):702-707.
4. The Joint Commission announces the 2005 National Patient Safety Goals and Requirements. Official publication of revised national patient safety goals. *Jt Comm Perspect* 2004;24:8.
5. Moran PJ, Fennessy P, Johnson MZ. Establishing a new national standard for the documentation of regional anaesthesia in Ireland. *BMJ Open Qual*. 2017;6(2):e000210.
6. Gandhi K, Patel V, Maliakal T, Xu D, Flisinski K. Universal Documentation Sheet for Peripheral Nerve Blocks. *The Journal of New York School of Regional Anaesthesia*. 2009;30(1):23-24.
7. Wilbanks BA, Geisz-Everson M, Boust RR. The role of documentation quality in anesthesia-related closed claims: A descriptive qualitative study. *CIN - Comput Informatics Nurs*. 2016;34(9):406-412.
8. Rosenquist RW, Williams BA. Optimizing Billing and Compliance. *Syllabus from the 2004 Annual Spring Meeting of the American Society of Regional Anesthesia and Pain Medicine*, Orlando FL. Pages 333–341
9. Australian And New Zealand College of Anaesthetists. Review Ps26 (2005) Guidelines on Consent for Anaesthesia or Sedation. Vol 26.; 2005.
10. Studdert DM, Mello MM, Levy MK, et al. Geographic Variation in Informed Consent Law : Two Standards for Disclosure of Treatment Risks. *Journal of Empirical Legal Studies*. 2007;4(1):103-124.
11. Mulroy MF. Systemic toxicity and cardiotoxicity from local anesthetics: incidence and preventive measures. *Reg Anesth Pain Med*. 2002;27(6):556-561.
12. Gerancher JC, Viscusi ER, Liguori GA, et al. Development of a standardized peripheral nerve block procedure note form. *Reg Anesth Pain Med*. 2005;30(1):67-71.
13. ASA Standards for Basic Anesthetic Monitoring, Guidelines for Regional Anesthesia in Obstetrics, and Documentation of Anesthesia Care. ASA House of Delegates 1986-2003. Updated 2010. Reaffirmed on December 13, 2020. <https://www.asahq.org/standards-and-guidelines/standards-for-basic-anesthetic-monitoring>
14. Miu M, Paech MJ. Documentation of regional anaesthesia for caesarean delivery. *Anaesth Intensive Care*. 2013;41(2):271-272.
15. Wu CL, Naqibuddin M, Fleisher LA. Measurement of patient satisfaction as an outcome of regional anesthesia and analgesia: a systematic review. *Reg Anesth Pain Med*. 2001;26(3):196-208.
16. Birnbach DJ, Meadows W, Stein DJ, Murray O, Thys DM, Sordillo EM. Comparison of povidone iodine and DuraPrep, an iodophor-in-isopropyl alcohol solution, for skin disinfection prior to epidural catheter insertion in parturients. *Anesthesiology*. 2003;98(1):164-169.
17. Cousins MJ, Bridenbaugh PO, Carr DB, Horlocker TT., *Neural Blockade in Clinical Anesthesia and Management of Pain*. 4th ed. Lippincott Williams & Wilkins (LWW). 2008.

18. Murphy DB, McCartney CJ, Chan VW. Novel analgesic adjuncts for brachial plexus block: a systematic review. *Anesth Analg*. 2000;90(5):1122-1128.
19. Wrong Site Surgery Summit addresses current problems, future solutions. *Jt Comm Perspect* 2003;23:8-9.
20. Neal JM, Hebl JR, Gerancher JC, Hogan QH. Brachial plexus anesthesia: essentials of our current understanding. *Reg Anesth Pain Med*. 2002;27(4):402-428.
21. Hadzic A, Hadzic's *Peripheral Nerve Blocks and Anatomy for Ultrasound-Guided Regional Anesthesia*. McGraw-Hill Medical. 2<sup>nd</sup> edition; 2012.
22. Lee LA, Posner KL, Domino KB, Caplan RA, Cheney FW. Injuries associated with regional anesthesia in the 1980s and 1990s: a closed claims analysis. *Anesthesiology*. 2004;101(1):143-152.
23. Liu SS, Salinas F V. Continuous plexus and peripheral nerve blocks for postoperative analgesia. *Anesth Analg*. 2003;96(1):263-272.
24. Hadzic A, Dilberovic F, Shah S, et al. Combination of intraneural injection and high injection pressure leads to fascicular injury and neurologic deficits in dogs. *Reg Anesth Pain Med*. 2004;29(5):417-423.
25. McGrath B, Chung F. Postoperative recovery and discharge. *Anesthesiol Clin North America*. 2003;21(2):367-386.
